# Supplementary material for: GPR119 agonist enhances gefitinib responsiveness through lactate-mediated inhibition of autophagy
Source: Springer Nature journal article supplement (doi:10.1186/s13046-018-0949-2), 2018-11-29

Figure S4

A

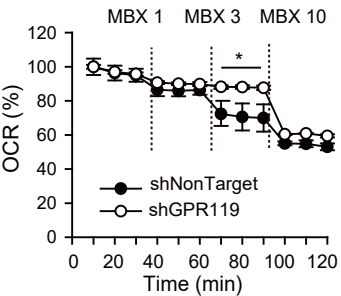

B

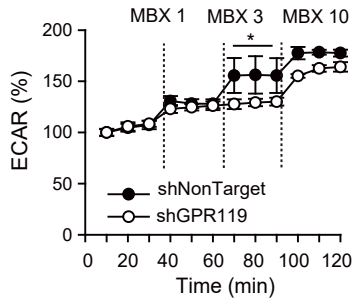

C

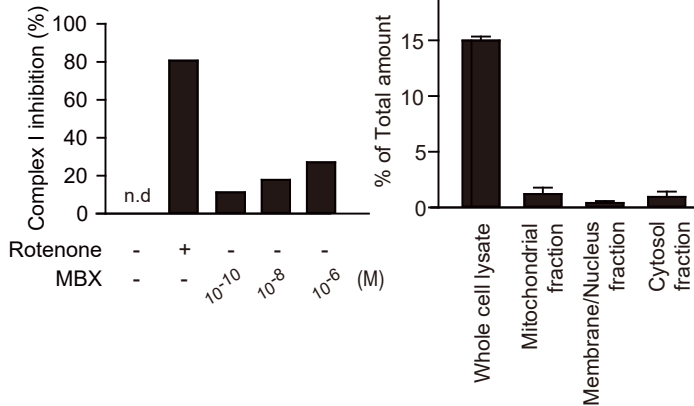

Supplement: MOESM4 [file 16304854]
